# Supplementary material for: The Occurrence of Oxidative Stress Induced by Silver Nanoparticles in Chlorella vulgaris Depends on the Surface-Stabilizing Agent
Source: MDPI journal article supplement (doi:10.3390/nano13131967), 2023-06-28
Supplement: s1 [file s1]

Supplementary Materials

# The Occurrence of Oxidative Stress Induced by Silver Nanoparticles in *Chlorella vulgaris* Depends on the Surface-Stabilizing Agent

Bruno Komazec <sup>1</sup>, Petra Cvjetko <sup>1</sup>, Biljana Balen <sup>1</sup>, Ilse Letofsky-Papst <sup>2</sup>, Daniel Mark Lyons <sup>3</sup> and Petra Peharec Štefanić <sup>1,\*</sup>

- <sup>1</sup> Department of Biology, Faculty of Science, University of Zagreb, Horvatovac 102a, 10000 Zagreb, Croatia; bruno.komazec@biol.pmf.unizg.hr (B.K.); pcvjetko@biol.pmf.unizg.hr (P.C.); bbalen@biol.pmf.unizg.hr (B.B.)
- <sup>2</sup> Institute of Electron Microscopy and Nanoanalysis (FELMI), Graz Centre for Electron Microscopy (ZFE), Austrian Cooperative Research (ACR), Graz University of Technology, Steyrergasse 17, 8010 Graz, Austria; ilse.papst@tugraz.at
- <sup>3</sup> Center for Marine Research, Ruder Bošković Institute, G. Paliaga 5, 52210 Rovinj, Croatia; lyons@irb.hr
- \* Correspondence: ppeharec@biol.pmf.unizg.hr

**Citation:** Komazec, B.; Cvjetko, P.; Balen, B.; Letofsky-Papst, I.; Lyons, D.M.; Štefanić, P.P. The Occurrence of Oxidative Stress Induced by Silver Nanoparticles in *Chlorella vulgaris* Depends on the Surface-Stabilizing Agent. *Nanomaterials* **2023**, *13*, 1967. <https://doi.org/10.3390/nano13131967>

Academic Editors: Marta Marmioli and Elena Maestri

Received: 2 June 2023

Revised: 23 June 2023

Accepted: 27 June 2023

Published: 28 June 2023

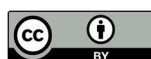

**Copyright:** © 2023 by the authors. Submitted for possible open access publication under the terms and conditions of the Creative Commons Attribution (CC BY) license (<https://creativecommons.org/licenses/by/4.0/>).

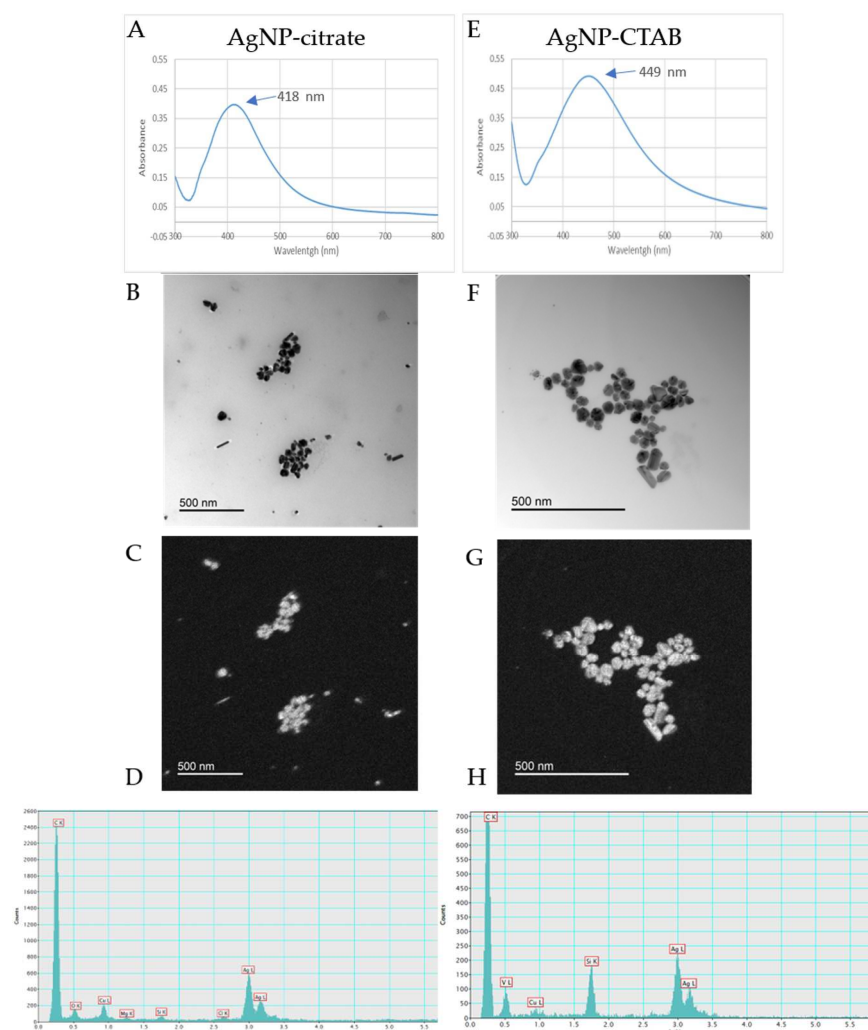

**Figure S1.** UV-Vis absorption spectra (A,E) and transmission electron micrographs of AgNP-citrate (B–D) and AgNP-CTAB (F–H) in stock solutions. Micrographs (B,F)—bright field image; (C,G)—

silver element map; (D,H)—energy-dispersive X-ray spectrum. For each stock solution, four replicates ( $n = 4$ ) were analysed.

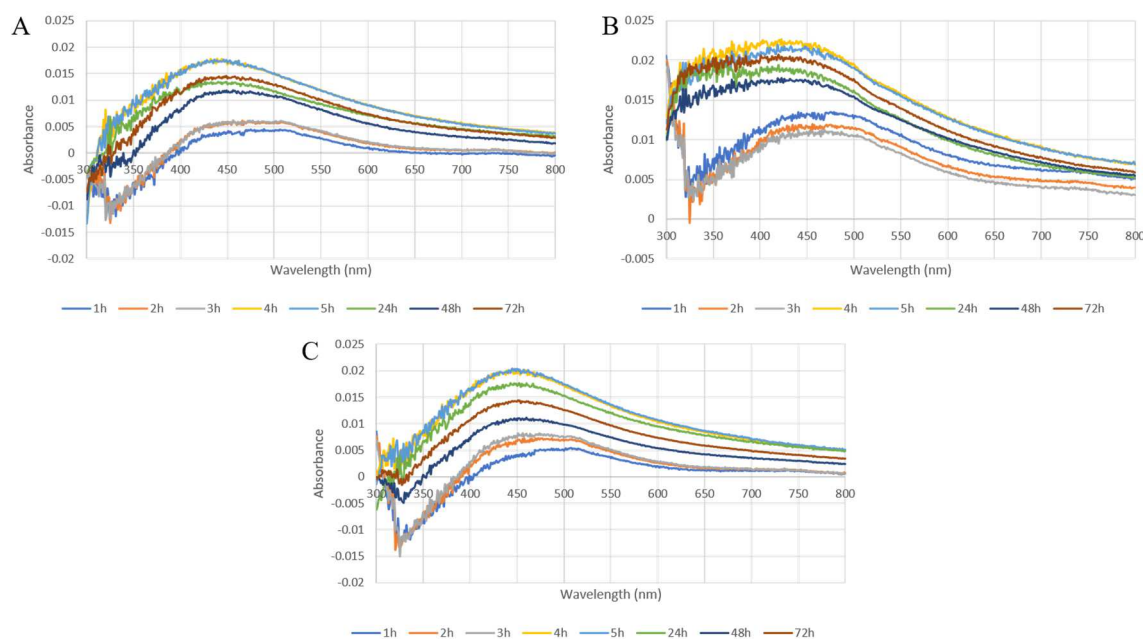

**Figure S2.** UV-Vis absorption spectra of 0.188 mg L<sup>-1</sup> AgNP-citrate (A), 0.895 mg L<sup>-1</sup> AgNP-CTAB (B), and 0.130 mg L<sup>-1</sup> AgNO<sub>3</sub> (C) after addition to a liquid BBM culture medium recorded over a period of three days.

**Table S1.** Physicochemical properties of AgNP-citrate and AgNP-CTAB in stock solutions based on hydrodynamic diameter ( $d_H$ ) in nm determined from size distributions by volume,  $\zeta$ -potential values in mV, and percentage of ionic silver (Ag<sup>+</sup>).

| Treatment                           | AgNP-Citrate  | AgNP-CTAB    |
|-------------------------------------|---------------|--------------|
| Hydrodynamic diameter ( $d_H$ ), nm | 41.4 ± 0.9    | 82.8 ± 1.1   |
| $\zeta$ potential, mV               | -40.50 ± 3.21 | 51.34 ± 2.05 |
| Concentration, mg L <sup>-1</sup>   | 112.2         | 94.6         |
| Ag <sup>+</sup> , %                 | 0.5           | 0.5          |

**Table S2.** Time evolution of changes in hydrodynamic diameter ( $d_H$ ) and zeta potential ( $\zeta$ ) of 0.188 mg L<sup>-1</sup> AgNP citrate, 0.895 mg L<sup>-1</sup> AgNP-CTAB, and 0.130 mg L<sup>-1</sup> AgNO<sub>3</sub> after addition to a liquid BBM culture medium, recorded over a three-day period. Results are presented as volume size distributions and represent the mean ± SE of 10 measurements. The  $\zeta$ -potentials are given as mean ± SE of 5 measurements.

| Time (h) | BBM Medium with AgNP-Citrate |                        | BBM Medium with AgNP-CTAB |                        | BBM Medium with AgNO <sub>3</sub> |                        |
|----------|------------------------------|------------------------|---------------------------|------------------------|-----------------------------------|------------------------|
|          | $d_H$ (nm)                   | $\zeta$ Potential (mV) | $d_H$ (nm)                | $\zeta$ Potential (mV) | $d_H$ (nm)                        | $\zeta$ Potential (mV) |
| 0        | 109.6 ± 3.5                  | -29.23 ± 0.02          | 106.5 ± 1.1               | -24.11 ± 3.70          | 174.7 ± 6.4                       | -11.17 ± 9.98          |
| 1        | 109.9 ± 2.6                  | -0.29 ± 0.06           | 115.6 ± 1.9               | -23.14 ± 2.05          | 163.5 ± 5.3                       | -10.35 ± 14.56         |
| 2        | 114.9 ± 2.8                  | -35.89 ± 3.07          | 115.1 ± 1.3               | -20.40 ± 1.87          | 161.3 ± 6.7                       | -27.46 ± 2.97          |
| 3        | 119.3 ± 1.5                  | -35.76 ± 4.20          | 114.7 ± 1.1               | -25.13 ± 5.00          | 173.9 ± 3.7                       | -31.26 ± 2.74          |
| 4        | 113.4 ± 0.7                  | -29.43 ± 0.26          | 117.6 ± 2.4               | -33.78 ± 4.25          | 161.9 ± 1.8                       | -15.62 ± 9.86          |
| 5        | 112.4 ± 2.5                  | -33.16 ± 7.18          | 118.0 ± 1.6               | -24.93 ± 3.17          | 155.9 ± 4.4                       | -7.42 ± 12.88          |
| 24       | 68.0 ± 0.7                   | -25.97 ± 11.29         | 114.3 ± 1.7               | -26.10 ± 2.20          | 94.9 ± 2.8                        | -26.76 ± 2.25          |
| 48       | 63.7 ± 0.9                   | -17.04 ± 9.32          | 114.3 ± 1.4               | -26.92 ± 4.08          | 94.8 ± 4.1                        | -34.78 ± 3.58          |
| 72       | 61.77 ± 1.8                  | 21.37 ± 5.42           | 131.5 ± 9.8               | -10.01 ± 11.80         | 84.8 ± 8.2                        | 0.00 ± 0.00            |
